# Supplementary material for: Autophagy-related genes are potential diagnostic and prognostic biomarkers in prostate cancer
Source: PubMed Central journal article supplement — Transl Androl Urol. 2020 Dec;9(6):2616–28. doi: 10.21037/tau-20-498 (PMC7807329; doi:10.21037/tau-20-498), 2020-12
Supplement: tau-09-06-2616-supplementary.pdf [file tau-09-06-2616-supplementary.pdf]

Supplementary

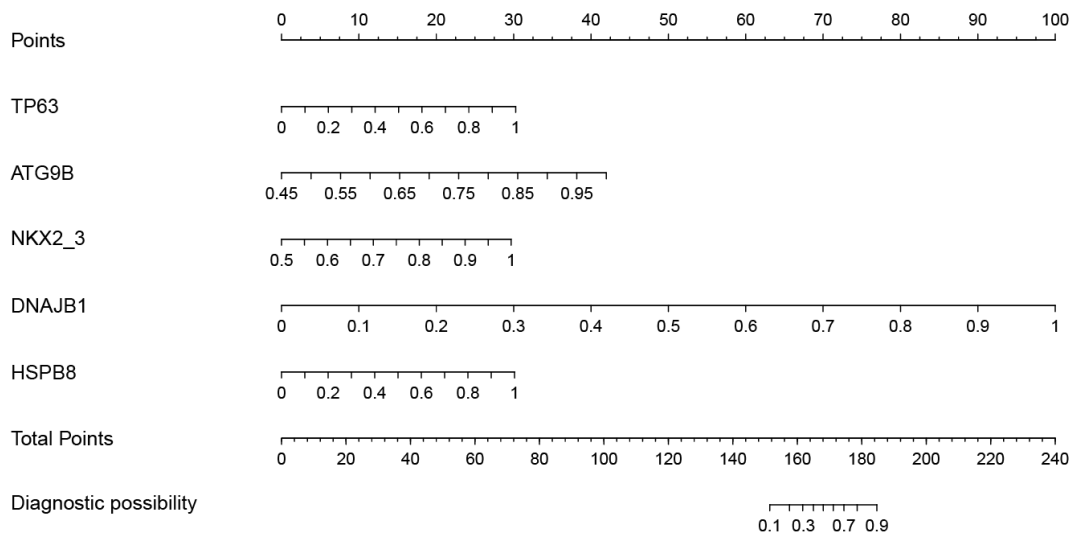

**Figure S1** Nomogram of the RI for predicting the risk of PCa consisted of 5 independent diagnostic genes (*ATG9B*, *DNAJB1*, *HSPB8*, *NKX2-3*, *TP63*).

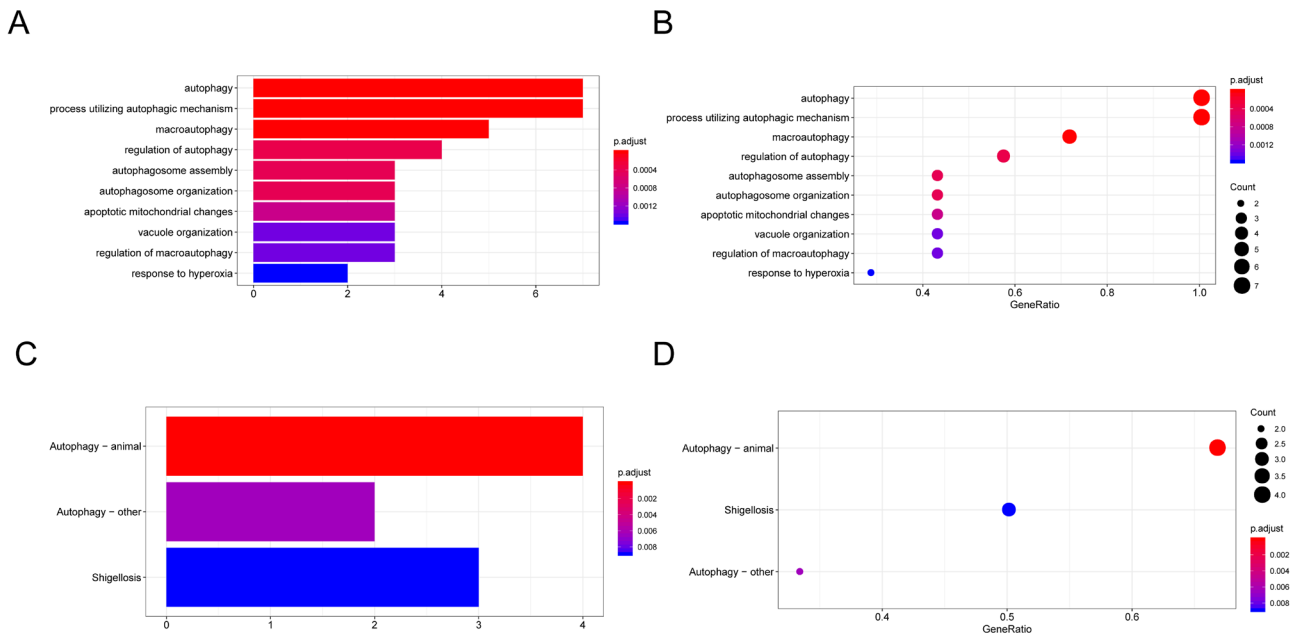

**Figure S2** GO and KEGG pathway analysis of survival related ARGs. (A,B) Bar plot and bubble plot of biological process GO terms for survival related ARGs. (C,D) Bar plot and bubble plot of KEGG pathway analysis for survival related ARGs. GO, gene ontology; KEGG, Kyoto Encyclopedia of Genes and Genomes; ARGs, autophagy-related genes.

**Table S1** Multicollinearity analysis of DEARGs

| Genes            | Collinearity statistics |       |
|------------------|-------------------------|-------|
|                  | Tolerance               | VIF   |
| <i>CAMKK2</i>    | 0.725                   | 1.379 |
| <i>ITPR1</i>     | 0.675                   | 1.481 |
| <i>TP63</i>      | 0.121                   | 8.279 |
| <i>HSPB8</i>     | 0.471                   | 2.123 |
| <i>ATG9B</i>     | 0.880                   | 1.136 |
| <i>TMEM74</i>    | 0.598                   | 1.673 |
| <i>NRG1</i>      | 0.388                   | 2.580 |
| <i>NRG2</i>      | 0.211                   | 4.748 |
| <i>ITGB4</i>     | 0.233                   | 4.293 |
| <i>BCL2</i>      | 0.407                   | 2.455 |
| <i>NKX2_3</i>    | 0.795                   | 1.258 |
| <i>CDKN2A</i>    | 0.770                   | 1.299 |
| <i>BIRC5</i>     | 0.838                   | 1.194 |
| <i>DNAJB1</i>    | 0.932                   | 1.073 |
| <i>SUPT20HL2</i> | 0.683                   | 1.463 |
| <i>FAM215A</i>   | 0.829                   | 1.206 |

DEARGs, differentially expressed auto-related genes; VIF, variance inflation factors.

**Table S2** Results of Hosmer and Lemeshow test of RI in different datasets

| Datasets  | c <sup>2</sup> value | P value               |
|-----------|----------------------|-----------------------|
| TCGA PRAD | 1.783                | 9.87×10 <sup>-1</sup> |
| GSE32571  | 4.473                | 8.12×10 <sup>-1</sup> |
| GSE46602  | 0.668                | 1.00                  |
| GSE70768  | 3.796                | 8.75×10 <sup>-1</sup> |

RI, risk index; TCGA, The Cancer Genome Atlas; PRAD, prostate adenocarcinoma.

**Table S3** Multicollinearity analysis of survival related ARGs

| Genes          | Collinearity statistics |       |
|----------------|-------------------------|-------|
|                | Tolerance               | VIF   |
| <i>RAB33B</i>  | 0.473                   | 2.115 |
| <i>ATG16L1</i> | 0.385                   | 2.599 |
| <i>NPC1</i>    | 0.385                   | 2.596 |
| <i>BNIP3</i>   | 0.723                   | 1.384 |
| <i>ATG3</i>    | 0.517                   | 1.935 |
| <i>USP10</i>   | 0.408                   | 2.452 |
| <i>TP53</i>    | 0.848                   | 1.179 |

ARGs, auto-related genes; VIF, variance inflation factors.
